# Supplementary material for: Facile Synthesis of Cadmium Doped Graphite Carbon Nitride for Photocatalytic Degradation of Tetracycline Under Visible Light Irradiation
Source: Research Square preprint supplement (doi:10.21203/rs.3.rs-1118826/v1), 2022-03-01
Supplement: Supplementary file 1 [file c820ab8203aca1ef0bd2a21c.docx]

Supporting Information

**Facile synthesis of cadmium doped graphite carbon nitride for photocatalytic degradation of tetracycline under visible light irradiation**

Yin Zhao a,b, Hong Qin a,b, Ziwei Wang a,b, Han Wang a,b, Yangzhuo He a,b, Quyang Tian a,b, Qianlan Luo c, Piao Xu a,b,*

*a College of Environmental Science and Engineering, Hunan University, Lushan South Road, Yuelu District, Changsha 410082, P. R. China*

*b Key Laboratory of Environmental Biology and Pollution Control (Hunan University), Ministry of Education, Lushan South Road, Yuelu District, Changsha 410082, P.R. China*

*c Changsha Liuyang Eco-environmental Monitoring Station, No. 1 Fuxing Middle Road in Liuyang, Changsha, P. R. China*

*Corresponding Author at: College of Environmental Science and Engineering, Hunan University, Changsha 410082, PR China; E-mail addresses: [piaoxu@hnu.edu.cn](mailto:piaoxu@hnu.edu.cn) (P. Xu).

**Table S1** Cadmium chloride contents in carbon nitride material samples.

| Samples | CdCl2（*wt. %*） |
| --- | --- |
| g-C3N4 | 0.00 |
| 5-Cd-g-C3N4 | 0.05 |
| 10-Cd-g-C3N4 | 0.10 |
| 15-Cd-g-C3N4 | 0.15 |

**Table S2** The proportion of each element in the 10-Cd-g-C3N4 material.

| Elements | Weight ratio% | Atomic percentage |
| --- | --- | --- |
| C K | 25.73 | 32.09 |
| N K | 61.98 | 66.28 |
| Cd L | 12.28 | 1.64 |

Table S2 illustrated the elements weight ratio of 10-Cd-g-C3N4 sample, where elements C was 25.73%, N was 61.98% and Cd was 12.28%. The atomic concentrations of Cd in the 10-Cd-g-C3N4 sample are 1.64%, which confirmed the cadmium doped in the g-C3N4 with a slight atomic ratio.

**Table S3** Surface area, pore volume and pore size parameters for pure g-C3N4 and 10-Cd-g-C3N4.

| Samples | Surface area1 (m2 /g) | Pore volume2 (cm3 /g) | Pore size3 (nm) |
| --- | --- | --- | --- |
| g-C3N4 | 13.467 | 0.077 | 22.131 |
| 10-Cd-g-C3N4 | 16.460 | 0.123 | 25.917 |

**Table S4** The comparison with other similar types research of this work.

| Samples | Experimental conditions | Degradation rate | Reference |
| --- | --- | --- | --- |
| Bi-g-C3N4 | [TC]0 =20 mg/L  [Catalyst]0=0.2 g/L  300 W Xe lamp | 94.1% in 50 min | (Wang et al. 2019) |
| K-g-C3N4 | [TC]0 =20 mg/L  [Catalyst]0=1.0 g/L  300 W Xe lamp | 85.1% in 1 h | (Wang et al. 2018) |
| P-g-C3N4 | [TC]0 =20 mg/L  [Catalyst]0=0.5 g/L  300 W Xe lamp | 93.7% in 120 min | (Zhang et al. 2020) |
| Pt2+-g-C3N4 | [RhB]0 =4 mg/L  [Catalyst]0=1 g/L  white LED (4.6 V, 2 A) | 90% in 120 min | (Chen et al. 2021) |
| NiO/Cd/g-C3N4 | [MB]0=3*10-5 mol/L  [Catalyst]0=1.0 g/L  50 W LED lamp | 81.8% in 90 min | (Karimi et al. 2020) |
| g-C3N4/Cd-ZnO | [MB]0 =10 mg/L  [Catalyst]0=0.5 g/L | 95% in 120 min | (Sher et al. 2021) |
| Cd-g-C3N4 | [TC]0 =10 mg/L  [Catalyst]0=0.8 g/L  300 W Xe lamp | 98.1% in 60 min | This work |


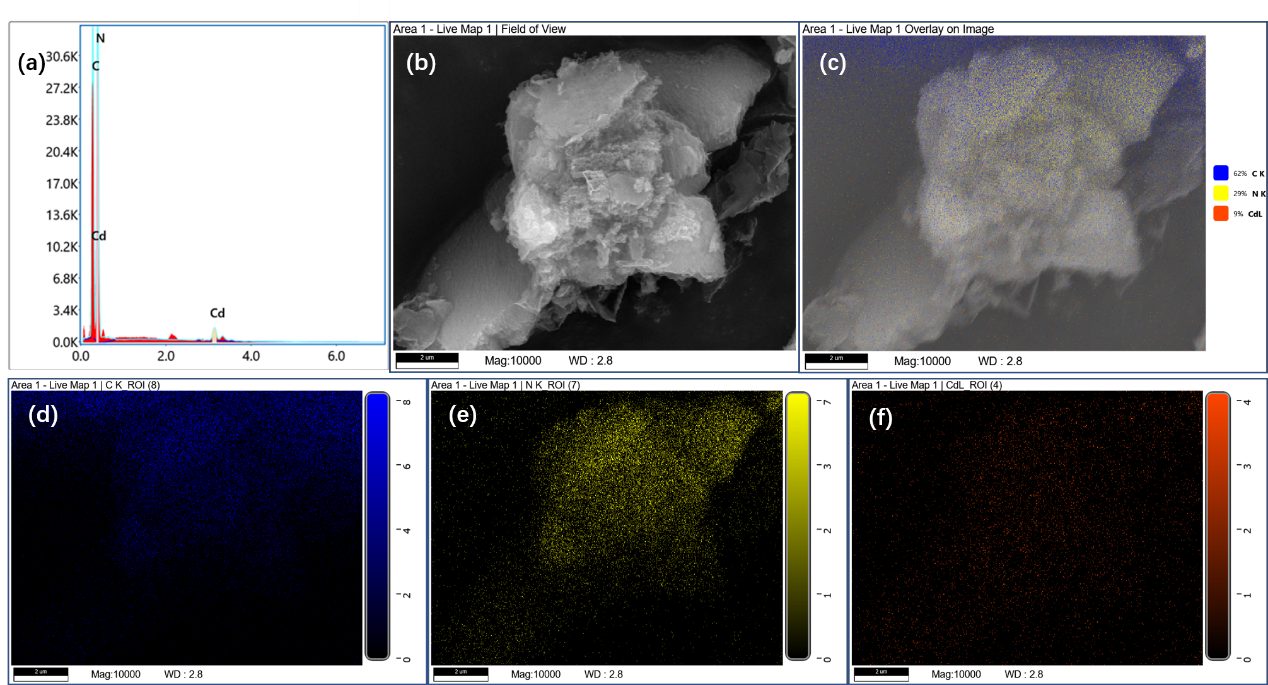


**Fig. S1** (a) EDS spectrum of 10-Cd-g-C3N4. (b-f) Elemental mapping of 10-Cd-g-C3N4.

**
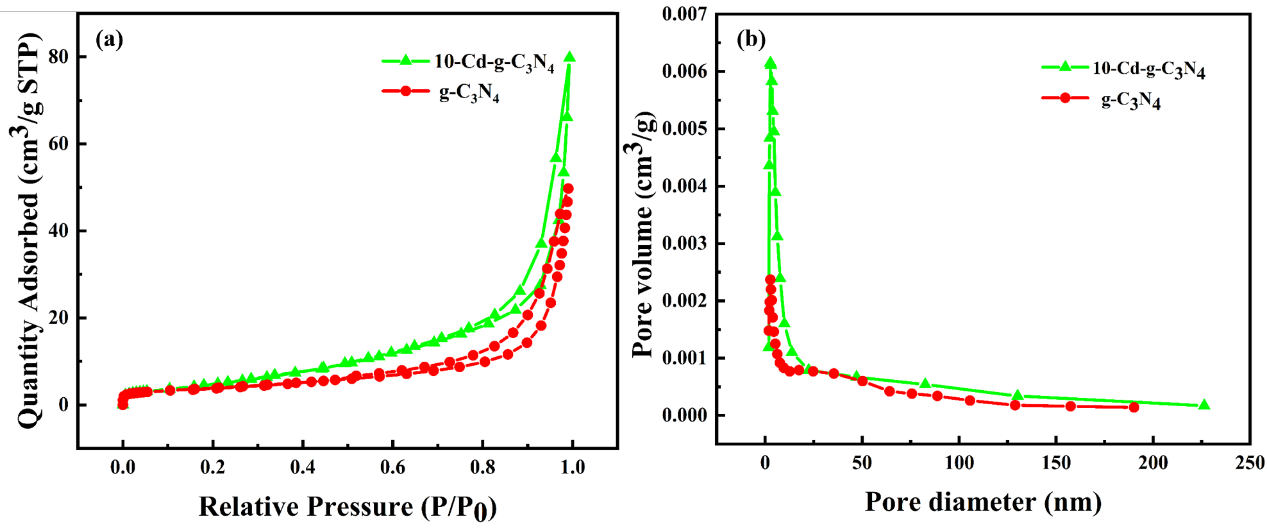
**

**Fig. S2** (a) N2 adsorption−desorption isotherms of pure g-C3N4 and 10-Cd-g-C3N4. (b) The pore size distributions image of pure g-C3N4 and 10-Cd-g-C3N4.


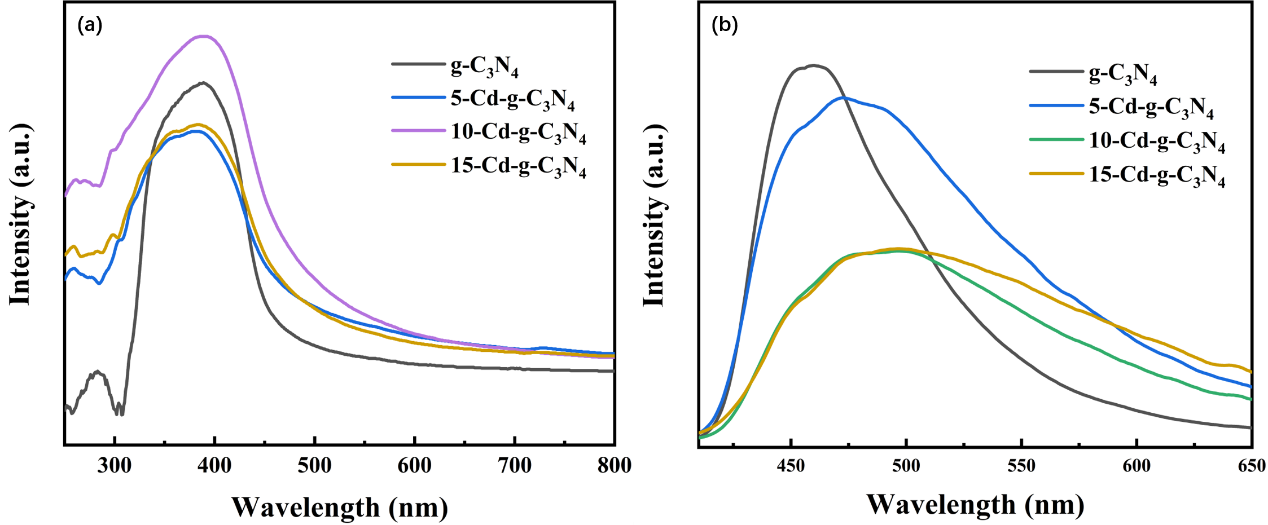


**Fig. S3** (a) The UV–vis diffuse reflectance spectra of pure g-C3N4 and Cd-g-C3N4. (b) The PL spectra of pure g-C3N4 and Cd-g-C3N4.

**
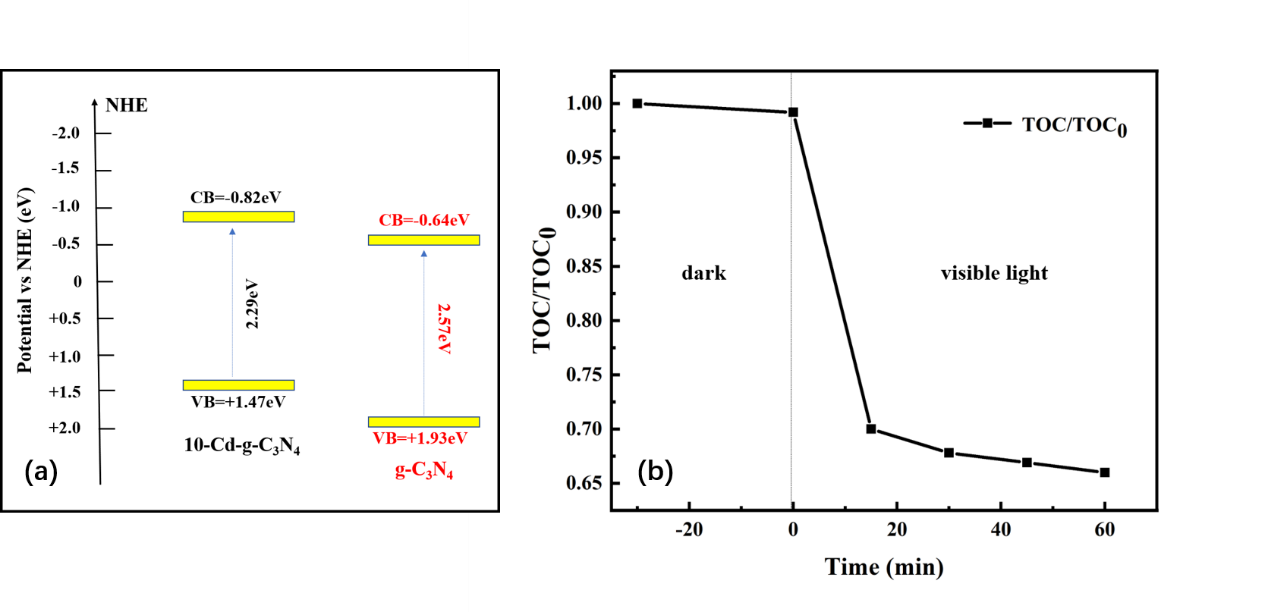
**

**Fig. S4** (a) Band structure diagram of pristine g-C3N4 and 10-Cd-g-C3N4.(b) TOC removal curves of TC on 10-Cd-g-C3N4.


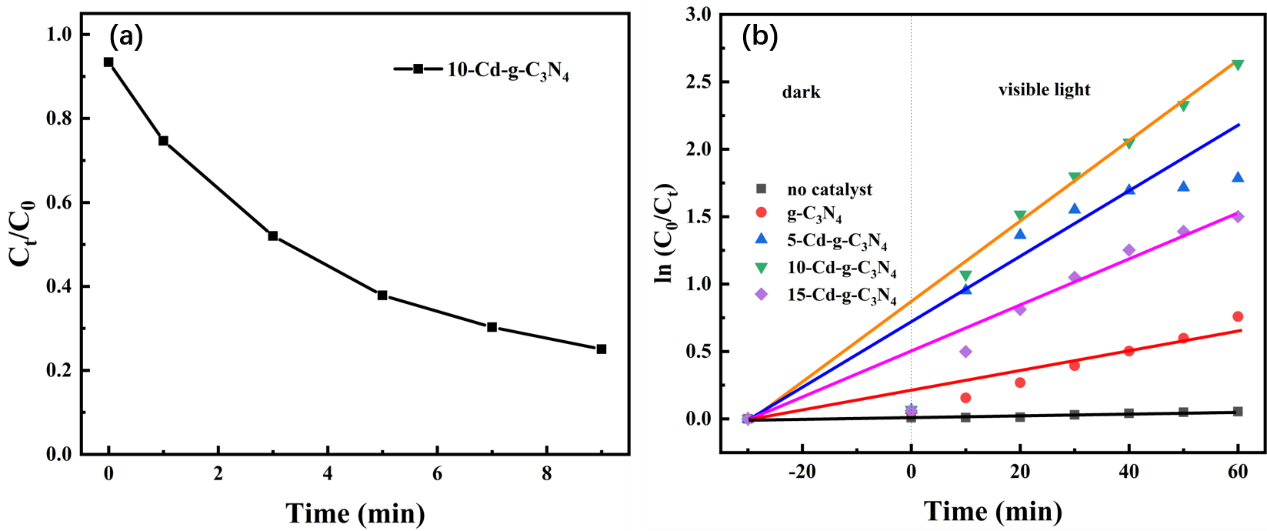


**Fig. S5** (a) The photocatalytic degradation of 10-Cd-g-C3N4 catalyst within 10 min. (b) First-order plots of photocatalytic degradation with different amounts cadmium catalysts.


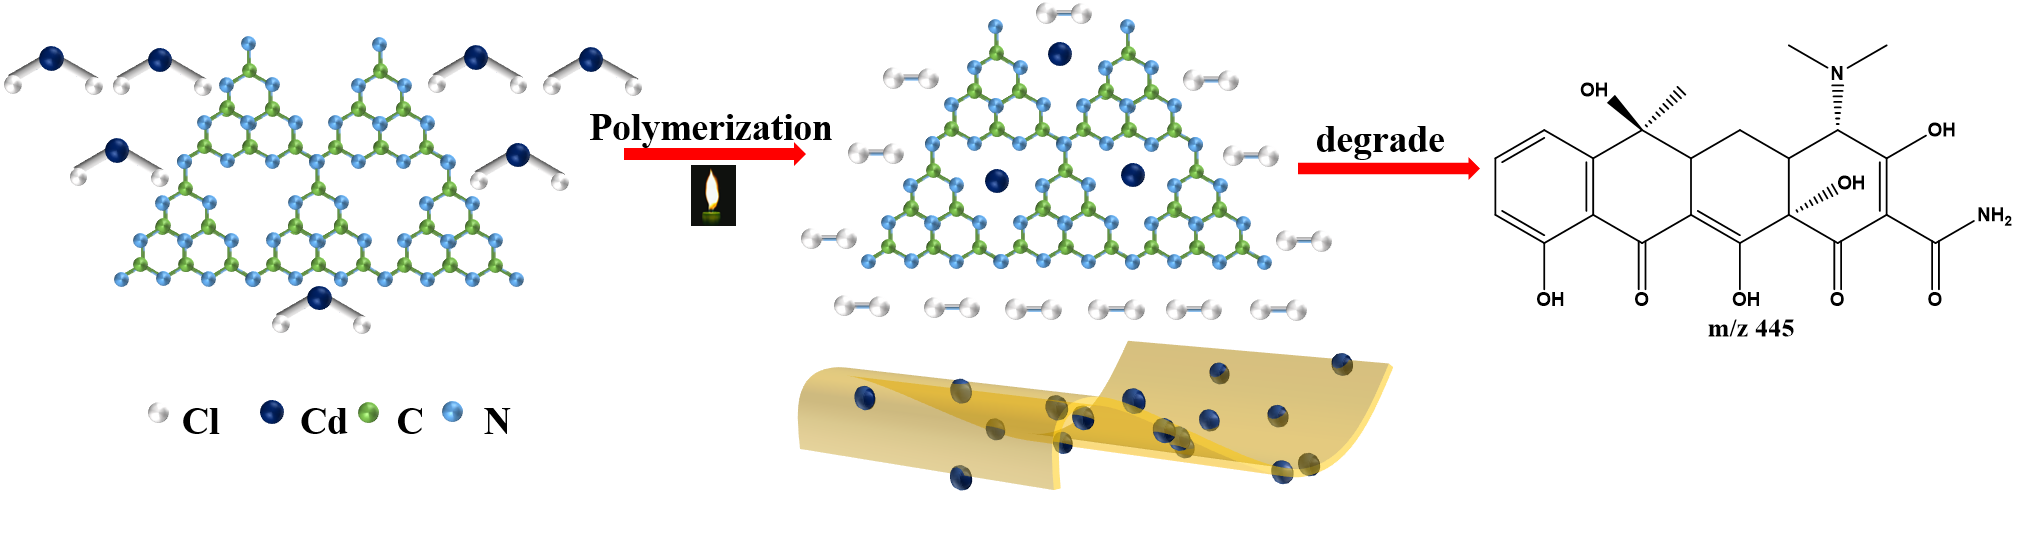


**Scheme S1** The brief diagram of 10-Cd-g-C3N4 prepared process.

**Reference:**

Chen Q, Wan B, Zhu P, Xu S, Huang Y (2021) The synergy of adsorption and photosensitization of platinum-doped graphitic carbon nitride for improved removal of rhodamine B. Environmental Science and Pollution Research. DOI: 10.1007/s11356-021-15340-0

Li Z, Liu Z, Li B, Li D, Ge C, Fang Y (2016) Novel CdS nanorods/g-C3N4 nanosheets 1-D/2-D hybrid architectures: an in situ growth route and excellent visible light photoelectrochemical performances. Journal of Materials Science: Materials in Electronics 27: 2904-2913. DOI：10.1007/s10854-015-4108-7

Karimi MA, Atashkadi M, Ranjbar M, Habibi-Yangjeh A (2020) Novel visible-light-driven photocatalyst of NiO/Cd/g-C3N4 for enhanced degradation of methylene blue. Arabian Journal of Chemistry 13: 5810-5820. DOI: 10.1016/j.arabjc.2020.04.018

Sher M, Javed M, Shahid S, Iqbal S, Qamar MA, Bahadur A, Qayyum MA (2021) The controlled synthesis of g-C3N4/Cd-doped ZnO nanocomposites as potential photocatalysts for the disinfection and degradation of organic pollutants under visible light irradiation. RSC Advances 11: 2025-2039. DOI: 10.1039/d0ra08573a

Wang M, Jin C, Li Z, You M, Zhang Y, Zhu T (2019) The effects of bismuth (III) doping and ultrathin nanosheets construction on the photocatalytic performance of graphitic carbon nitride for antibiotic degradation. Journal of Colloid and Interface Science 533: 513-525. DOI：10.1016/j.jcis.2018.08.113

Wang W, Xu P, Chen M, Zeng G, Zhang C, Zhou C, Yang Y, Huang D, Lai C, Cheng M, Hu L, Xiong W, Guo H, Zhou M (2018) Alkali Metal-Assisted Synthesis of Graphite Carbon Nitride with Tunable Band-Gap for Enhanced Visible-Light-Driven Photocatalytic Performance. ACS Sustainable Chemistry & Engineering 6: 15503-15516. DOI：10.1021/acssuschemeng.8b03965

Zhang Y, Zhang M, Tang L, Wang J, Zhu Y, Feng C, Deng Y, He W, Hu Y (2020) Platinum like cocatalysts tungsten carbide loaded hollow tubular g-C3N4 achieving effective space separation of carriers to degrade antibiotics. Chemical Engineering Journal 391: 123487. DOI：10.1016/j.cej.2019.123487
